1           **Birds invest wingbeats to keep a steady head and reap the**  
2                                           **ultimate benefits of flocking**

3  
4       Lucy A. Taylor<sup>1\*</sup>, Dora Biro<sup>1</sup>, Ben Lambert<sup>1,2</sup>, James A. Walker<sup>1</sup>, Graham K. Taylor<sup>1</sup> and  
5                                           Steven J. Portugal<sup>3</sup>

6  
7   **Affiliations:**

8   <sup>1</sup> Department of Zoology, University of Oxford, South Parks Road, Oxford, OX1 3PS, UK.

9   <sup>2</sup> Department of Infectious Disease Epidemiology, Imperial College London, St Mary's  
10 Campus, Norfolk Place, London W2 1PG

11   <sup>3</sup> School of Biological Sciences, Royal Holloway, University of London, Egham, Surrey,  
12 TW20 0EX, UK.

13  
14   \*Correspondence to: [lucy.taylor@zoo.ox.ac.uk](mailto:lucy.taylor@zoo.ox.ac.uk)  
15

16 **Abstract**

17

18 Flapping flight is the most energetically demanding form of sustained forwards locomotion  
19 that vertebrates perform. Flock dynamics therefore have significant implications for energy  
20 expenditure. Despite this, no studies have quantified the biomechanical consequences of flying  
21 in a cluster flock relative to flying solo. Here, we compared the flight characteristics of homing  
22 pigeons (*Columba livia*) flying solo and in pairs, using high-precision 5 Hz GPS and 200 Hz  
23 tri-axial accelerometer biologgers. Paired flight increased route accuracy by ~7%, but, was  
24 accompanied by an increase in wingbeat frequency of ~18%. As expected, paired individuals  
25 benefitted from improved homing route accuracy, which reduced flight distance by ~7% and  
26 time by ~9%. However, realising these navigational gains involved substantial changes in flight  
27 kinematics and energetics. Both individuals in a pair increased their wingbeat frequency by  
28 *c.* 18%, by decreasing the duration of their upstroke. This sharp increase in wingbeat frequency  
29 caused just a 3% increase in airspeed, but reduced the oscillatory displacement of the body by  
30 ~22%, which we hypothesise relates to an increased requirement for visual stability and  
31 manoeuvrability when flocking. Overall, the shorter flight distances and increased wingbeat  
32 frequency in a pair resulted in a net increase in the aerodynamic cost of returning home, which  
33 we estimate was ~14%. Our results demonstrate that flocking costs have been underestimated  
34 by an order of magnitude and force reinterpretation of their mechanistic origin. We show that,  
35 for pigeons, two heads are better than one, but keeping a steady head necessitates energetically  
36 costly kinematics.

37

38 **Key words:** accelerometer, biologging, energy, flocking, pigeon, stabilisation, wingbeat  
39 frequency

## 40 **Introduction**

41

42 Across the animal kingdom many species travel in groups, from pairs to flocks, shoals, herds  
43 and swarms, some containing millions of individuals [1,2]. Indeed, the collective motion of  
44 animals produces some of the most spectacular displays of synchronisation and coordination  
45 in the world [3]. Commonly cited benefits of collective travel include an improved ability to  
46 detect and avoid predators [1,4], enhanced orientational efficiency through the pooling of  
47 navigational knowledge [5–8], and energetic efficiencies derived from fluid dynamic  
48 interactions [9–13]. Flocking in birds, in particular, has received considerable attention due to  
49 the complex aerodynamic interactions that take place between group members [11–14].

50

51 Avian flock formations can be categorised as either line formations or cluster formations  
52 [15,16]. Line formations, which include the distinctive ‘V’ of many long-distance migrants,  
53 are utilised by medium to large-sized birds, such as northern bald ibis (*Geronticus eremita*)  
54 and Canada geese (*Branta canadensis*), whereas cluster formations are typically observed in  
55 smaller birds, such as homing pigeons (*Columba livia*) and common starlings (*Sturnus*  
56 *vulgaris*), which fly in irregular three-dimensional flocks [11–16]. Birds flying in close cluster  
57 flocks in particular are able to move with near perfect synchrony, whilst making rapid  
58 directional changes in three dimensions. While birds travelling in V-formation can save energy  
59 by flying in aerodynamically optimal positioning within the V [11–13], those species flying in  
60 cluster flocks have been shown to incur an additional energetic cost in denser formations [14].  
61 In homing pigeons, for example, a tenfold increase in the spatial density of a flock has been  
62 observed to be associated with a modest 0.1 Hz increase in wingbeat frequency, and was  
63 presumed to be accompanied by an energetic cost over the seven flights that were observed  
64 [14]. Flapping flight is the most energetically demanding form of sustained forwards

65 locomotion that vertebrates perform [17,18], and flock dynamics may therefore have  
66 significant implications for individual energy expenditure and lifetime fitness. However, no  
67 studies have yet compared the biomechanical consequences of flying in a pair to flying solo,  
68 so the energetic impact of this form of flocking is unknown.

69

70 To fill this fundamental gap, we recorded the body accelerations associated with every  
71 wingbeat of 20 free-flying homing pigeons flying solo and in pairs as they homed from a site  
72 7 km east of their loft (Fig. 1A). The birds were equipped with 5 Hz GPS trackers and 200 Hz  
73 tri-axial accelerometer biologgers which allowed us to reconstruct their trajectories and  
74 wingbeat patterns during each homeward flight (see Methods; Fig. 1B-F) [19,20]. The  
75 experiment consisted of four phases. In Phase 1, each subject first completed 21 successive  
76 solo flights (Fig. 1F), the last six of which provided the solo baseline (solo 1). During these six  
77 solo flights, the median wingbeat frequency and amplitude (dorsal body displacement) for all  
78 birds were  $5.48 \pm 0.19$  Hz (grand mean of the median value of each flight  $\pm$  s.d. of the individual  
79 means) and  $20.68 \pm 1.17$  mm, respectively (after accounting for the effects of airspeed, date of  
80 release and weather variables including wind support, crosswind, temperature, humidity and  
81 air density; Fig. 2A). These wingbeat frequencies are consistent with those measured  
82 previously for solo pigeon flights [20,21]. In Phase 2, following the solo releases, birds were  
83 released six times from the same – now familiar – site, but in similar-sized pairs. Pairs were  
84 assigned based on similarity in body mass and structural size as measured by tarsus length [22].  
85 Body size and mass are strong predictors of preferred flight speeds in birds, both at the intra-  
86 and inter-specific levels, with optimal flight speeds usually assumed to be those for which the  
87 cost of transport (i.e. energy expenditure per unit distance) is predicted to be at its minimum  
88 [18]. Therefore, we hypothesised that for birds of different sizes either one or both birds may  
89 have to adjust their wingbeat frequency and/or amplitude to stay together as a pair, which

90 would represent an additional ‘hidden’ compromise cost of flying with another bird. In Phase  
91 3, immediately following completion of the six similar-sized pair releases, each bird was then  
92 flown in size-mismatched pairs for a further six flights (different-sized pairs), again from the  
93 same site. Finally, in Phase 4, upon completion of the six size-mismatched flights, each bird  
94 flew six times solo again (Fig. 2D). We compared the wingbeat characteristics of birds flying  
95 in pairs relative to flying solo to determine if pigeons alter their wingbeat characteristics when  
96 flying in a pair.

97

## 98 **Results**

99

100 We analysed the data from all flights using Bayesian hierarchical models to account for  
101 variation due to a set of environmental covariates, and the individual identity of the focal bird  
102 and any partner (see Methods). Our results show that when birds flew in pairs, their median  
103 wingbeat frequency increased by 1.00 Hz (95% Bayesian credible interval (CrI) [0.61, 1.38])  
104 relative to flying solo, representing an increase of 18.2% (Fig. 2B-C). This was not associated  
105 with greater variability in wingbeat frequency, the standard deviation of which remained stable  
106 between solo and paired flight (2% lower standard deviation for size-matched pairs). Likewise,  
107 the median peak-to-peak amplitude of dorsal body (DB) acceleration was similar in both solo  
108 and paired flights (difference of 0.16 g, where g is gravitational acceleration; 95% CrI [-0.16,  
109 0.47], where the fact that the credible interval crosses zero indicates that any difference is  
110 statistically indistinguishable from zero). This combination of increased wingbeat frequency  
111 and unchanged amplitude of DB acceleration resulted in a net 22.5% reduction in the median  
112 peak-to-peak amplitude of dorsal body (DB) displacement (-4.65 mm, 95% CrI [-6.31, -3.06])  
113 through the wingbeat, as a result of the correspondingly shorter time period over which DB

114 acceleration is integrated to produce DB displacement (see supplementary text for further  
115 analysis of the oscillatory accelerations experienced by an accelerometer).

116

117 These statistical findings were consistent within and between pairs, irrespective of whether the  
118 birds were flying in similar-sized or different-sized pairs (0.01 Hz increase per mm difference  
119 in tarsus length between the pair; 95% CrI [-0.13, 0.16]; Fig. S1), or whether the bird was in  
120 front or behind during the flight (0.01 Hz increase for travelling behind, 95% CrI [-0.10, 0.12]).

121 Moreover, the probability of whether an individual bird flew ahead in a given pair was  
122 unaffected by the birds' tarsus length (0.01 per mm difference in tarsus length, 95% CrI [-2.68,  
123 2.44]), solo airspeed (-0.22 per m s<sup>-1</sup> difference in median solo airspeed, 95% CrI [-3.08, 2.65])

124 or body mass (0.02 per g difference in body mass, 95% CrI [-0.10, 0.15]; Fig. S4), meaning

125 there is no evidence that the larger or faster bird sets the pace by leading. Interestingly, and in  
126 contrast to the closely coordinated flight of birds flying in V-formation[12], there was no  
127 correspondence between the front and back bird's median wingbeat frequency ( $\beta = -0.23$ , 95%

128 CrI [-1.23, 0.75]; Fig. S3), indicating that their wingbeats cannot have been phase-locked  
129 through most of the flight. All of these results were computed after accounting for the birds'

130 median airspeed, date of release and weather variables, none of which had an effect on  
131 wingbeat frequency that was distinguishable from zero (Fig. S2, Table S1). Hence, whilst we

132 found no evidence in support of our hypothesis that birds of different sizes would specifically  
133 have to adjust their wingbeat frequency or amplitude to stay together as a pair, we found clear

134 evidence that both birds in a pair increased their wingbeat frequency, independent of individual  
135 size or solo flight speed.

136

137 In addition to these results for all releases, one similar-sized pair and one different-sized pair  
138 separated during three releases each, which means we can fortuitously compare sections of

139 paired and solo flight within the same release. The results for these six releases clearly confirm  
140 that wingbeat frequency increases as a direct result of flying in a pair, because the birds' median  
141 wingbeat frequency decreased by  $1.01 \pm 0.30$  Hz (mean  $\pm$  s.d.) after they separated and flew  
142 solo (raw values with no covariates; Fig. 2E-H).

143

144 As previous research has shown that pigeons increase their wingbeat frequency by up to 0.1  
145 Hz as flock density increases [14], we analysed the effect of horizontal inter-individual distance  
146 ranging from 0 m (i.e. directly above or below another bird) to 50 m (i.e. the cut off point for  
147 flying in a pair) in a random sample of 100 wingbeats from each flight. This subsampling was  
148 necessary due to the computational demands of dealing with the otherwise extremely large  
149 volume of data. In total, we analysed 45,500 wingbeats from solo and paired flights. The results  
150 demonstrate that birds flying with no horizontal spacing did indeed have the highest wingbeat  
151 frequency (increase of 1.21 Hz relative to flying solo; 95% CrI [0.81, 1.61], 21.6%), with  
152 wingbeat frequency decreasing by 0.011 Hz for every metre increase in horizontal spacing  
153 (95% CrI [-0.012, -0.009]). Thus, birds flying 50 m apart had an expected wingbeat frequency  
154 0.54 Hz lower than birds flying 0 m apart. Nevertheless, the act of flying in a pair still had a  
155 larger overall effect than the distance between (or density of) the birds, which meant that even  
156 birds flying 50 m apart increased their wingbeat frequency by 0.66 Hz (11.9%) relative to  
157 flying solo. On average, birds flew with a median spacing  $12.12 \pm 4.76$  metres (mean of the  
158 means for all pairs  $\pm$  standard deviation), which equates to a 1.07 Hz increase in wingbeat  
159 frequency under the fitted relationship (*cf.* the 1.00 Hz increase in median wingbeat frequency  
160 was over the whole flight).

161

162 To explore the mechanism underlying this change in wingbeat frequency, we divided each  
163 wingbeat into an upstroke and a downstroke phase. We defined these phases with respect to

164 the peaks and troughs of the DB acceleration, which results from a combination of aerodynamic  
165 and inertial forcing (see supplementary text for further detail). Whereas the dorsal aerodynamic  
166 force is expected to peak mid-downstroke when the wing reaches its maximum flapping speed,  
167 the dorsal inertial force is expected to peak at the start of the downstroke when the wing's  
168 downwards acceleration is maximal. It follows that the maximum DB acceleration will be  
169 reached somewhere between the start and middle of the kinematic downstroke, and similarly  
170 for the minimum, which will be reached somewhere between the start and middle of the  
171 kinematic upstroke. Hence, the downstroke phase, which we define as running from the point  
172 of maximum to minimum DB acceleration, is expected to lag the kinematic downstroke slightly  
173 (and similarly for the upstroke), but by less than a quarter of a cycle. With these definitions,  
174 we found that birds reduced the median duration of the upstroke phase by 20.6% (-27.99  
175 milliseconds, 95% CrI [-35.61, -19.92]) when flying in pairs, whereas the median duration of  
176 the downstroke phase did not vary significantly (-3.53 milliseconds, 95% CrI [-8.35, 1.38]; 2c-  
177 d). It is clear by inspection of the wingbeat acceleration traces that this decrease in upstroke  
178 duration results in a less asymmetric pattern of forces between the two wingbeat phases  
179 (compare red versus blue lines in Fig. 1B-E), so that this change in wingbeat frequency  
180 essentially represents a switching of kinematic – if not aerodynamic – gait [24].

181

182 We hypothesise that a potential function of increasing wingbeat frequency and decreasing  
183 oscillatory displacement of the body may be to enhance visual stability when attending to  
184 nearby conspecifics. We therefore conducted a second experiment using head-mounted  
185 accelerometers on six homing pigeons on short-range flights (950 m), flying solo and in pairs,  
186 to determine if the same measured changes in wingbeat characteristics result in increased head  
187 stability (see Methods). In close agreement with the first experiment, birds flying in pairs  
188 increased their median wingbeat frequency by a mean of  $1.10 \text{ Hz} \pm 0.26$  relative to flying solo



189 (6.6 ± 0.42 Hz mean ± s.d. for pairs; 5.5 ± 0.46 Hz for solo). More importantly, however, the  
190 results also show that the median peak-to-peak head displacement simultaneously decreased  
191 by  $5.3 \times 10^{-3} \text{ m} \pm 6.6 \times 10^{-4}$  between solo and paired flight, representing a 30% reduction in the  
192 amplitude of oscillatory head displacement (Fig. 3). This substantial improvement in  
193 translational head stability is expected to result in a significant reduction in the retinal slip of  
194 nearby objects including flight partners.

195

196 In summary, by reducing the duration of their upstroke phase, birds flying in a pair were able  
197 to accommodate one additional wingbeat per second, whilst maintaining the same peak-to-peak  
198 DB acceleration and simultaneously increasing the vertical stability of the head. Intuitively, a  
199 higher-frequency kinematic gait adopted in paired flight will therefore be associated with a  
200 higher mechanical power input than the lower-frequency flight kinematic gait adopted in solo  
201 flight. Of course, a higher mechanical power requirement in paired flight could still be  
202 associated with a lower cost of transport if this increased frequency were more than  
203 compensated by an increased flight speed. However, whereas birds migrating in V-formations  
204 are known to increase their airspeed as flock size increases [25], the birds in our study only  
205 increased their airspeed by 3.3% when flying in pairs (0.64 m s<sup>-1</sup> increase, 95% CrI [0.08, 1.2]).  
206 As we now explain, this increase in airspeed is much smaller than could have been expected to  
207 be caused by the increase in wingbeat frequency alone, suggesting that there must have been  
208 other compensatory changes in the kinematics.

209

210 In cruising flight, the net thrust of the wings balances the drag on the body, which scales as  
211  $\rho U^2 S_b$  where  $\rho$  is air density and  $S_b$  is body frontal area. For a 3% increase in airspeed  $U$ , it  
212 follows that the time-averaged thrust can only have increased by just over 6%. In contrast, the  
213 thrust on a flapping wing has been shown to scale as  $T \sim \rho S_w f^2 A^2$ , where  $S_w$  is wing area,  $f$  is

214 wingbeat frequency, and  $A$  is wingbeat amplitude [26]. Assuming all other things are equal, an  
215 18% increase in wingbeat frequency would therefore be expected to produce about a 39%  
216 increase in thrust. However, we also know that the time-averaged lift must balance the bird's  
217 weight when cruising, and that lift scales as  $L \sim \rho S_w U^2$  in fast forward flight when the  
218 contribution of the wing's own flapping speed can be ignored. This implies that the 3% increase  
219 in airspeed (i.e 6% increase in  $U^2$ ) would have to have been countered by either a 6% decrease  
220 in wing area, or an equivalent decrease in the proportionality constant of the scaling  
221 relationship (i.e. the wing lift coefficient). Either kinematic change would be expected to  
222 attenuate the thrust similarly, thereby reducing its expected increase to approximately 31%.  
223 This is still significantly higher than the 6% increase in thrust estimated on the basis of the 3%  
224 increase in airspeed, but the scaling  $T \sim \rho S_w f^2 A^2$  implies that these figures could be brought  
225 into line by an accompanying 10% decrease in wingbeat amplitude (see supplementary text for  
226 further confirmation).

227

228 The aerodynamic power requirement of a flapping wing has been shown to scale as  
229  $P_A \sim \rho c S_w f^3 A^2$  where  $c$  is the wing chord [26]. The inertial power requirement also varies in  
230 proportion to  $f^3 A^2$ , albeit with some further complications related to the effect of varying wing  
231 span, but is an order of magnitude smaller than the aerodynamic power requirement [27,28] so  
232 is neglected here for simplicity. Assuming that the 18% increase in wingbeat frequency  $f$   
233 between solo and paired flight was accompanied by a 6% decrease in wing area  $S_w$  and by a  
234 10% decrease in wingbeat amplitude  $A$  as required to meet the equilibrium conditions above,  
235 then the aerodynamic power requirement (in  $\text{J s}^{-1}$ ) would have increased by approximately 25%  
236 when flying in a pair. Given the 3% increase in airspeed, it follows that the aerodynamic cost  
237 of transport (in  $\text{J m}^{-1}$ ) must also have increased by some 21%. However, another key benefit  
238 often ascribed to flying in flocks is the ability to pool navigational knowledge. This should

239 improve homing route accuracy [7,8], which could offset the increased aerodynamic cost of  
240 transport and increased aerodynamic power requirement by simultaneously decreasing the  
241 distance and duration of the flight.

242

243 We calculated the birds' route accuracy flying solo and in pairs using a weighted mean cosine  
244 of the angle between the birds' heading and destination. Flying in a pair resulted in a 6.9%  
245 increase in route accuracy relative to both the Phase 1 and Phase 4 solo releases (0.06, 95% CrI  
246 [0.01, 0.10]; Fig. 1), and a 6.5% decrease in route length (Table S2). This is consistent both  
247 with theory[7,8] and with previous empirical studies [5,6]. Offsetting the 21% higher cost of  
248 transport when flying in a pair against the 6.5% reduction in route length, we would expect a  
249 net increase of approximately 14% in the total mechanical energy expended when flying home  
250 to the loft in a pair. The increase in the total metabolic energy expended could be higher or  
251 lower than this, depending upon whether and how the efficiency of the flight muscles varies  
252 with flapping frequency, but it is reasonable to assume that an increase in mechanical energy  
253 would also be associated with an increase in metabolic energy.

254

255 Whilst these figures are necessarily approximate, the qualitative conclusion of this analysis –  
256 that the energy expended returning to the loft would have been higher in paired than in solo  
257 flight – is robust to the uncertainty in our estimates of the changes in wingbeat frequency and  
258 airspeed. Substituting the limits of the 95% CrI's for these variables into the preceding  
259 calculations leads to an estimated 4% or 24% increase in the total energy expended in paired  
260 flight if the variables fall at their respective upper or lower limits, and an estimated 10% or  
261 17% increase if they fall at opposite ends of their limits. These are worst-case figures for how  
262 the uncertainties could combine, all of which lead to the conclusion that flying in pairs is  
263 associated with a substantial net increase in energy consumption over the flight. As we now

264 discuss, this surprising result indicates: that (i) the act of flying in a pair necessitates birds to  
265 alter their wing kinematics to a higher-frequency kinematic gait; and that either (ii) the  
266 navigational benefits of flying in a pair are sufficient to outweigh the increased cost of transport  
267 over longer homing distances, such that flying in pairs makes sense as a general homing  
268 strategy, or (iii) there are other benefits of paired flight that outweigh its net energetic cost even  
269 over short distances.

270

## 271 **Discussion**

272

273 One of the most commonly cited reasons for travelling as a group is to reduce energy  
274 expenditure and enhance locomotor performance [11,12]. Previous research in cluster flocking  
275 pigeons has shown that the energetic cost of flocking increases slightly with increasing flock  
276 density [14]. However, this study did not compare the cost of flying in a cluster flock relative  
277 to the alternative of flying solo, which means, as we now show, that previous work has  
278 inadvertently understated the energetic costs of cluster flocking by an order of magnitude.  
279 Specifically, whereas pigeons have previously been shown to increase their wingbeat  
280 frequency by a mere 0.1 Hz with increasing flock density [14], our results show that the very  
281 act of flying with another bird increases a pigeon's wingbeat frequency by 1.0 Hz (18%), which  
282 results in an estimated 21% increase in the aerodynamic cost of transport. Although birds flying  
283 in pairs were simultaneously able to offset some of the energetic cost by flying more accurate  
284 routes home, the increases in route accuracy and airspeed were insufficient to compensate for  
285 the increased aerodynamic power requirements, which resulted in a net energetic loss on the  
286 order of 14% when flying moderate distances (~7 km) together in a cluster formation.  
287 Moreover, the fact that pigeons flying in pairs display a 18% increase in wingbeat frequency  
288 over solo flight suggests that the majority of the additional cost comes merely from the act of

289 flying with another individual, rather than from the density of the flock, the relative spatial  
290 position of the bird, or the size of its partner. Indeed, the size of a bird's partner, and whether  
291 that bird was a leader or follower, had almost no effect on its measured wingbeat pattern. Even  
292 so, differences in inter-individual horizontal spacing did result in a 0.54 Hz difference in  
293 wingbeat frequency between birds travelling 0 to 50 m apart, with this increase ranging from  
294 11.9 to 21.6 %, respectively. Thus, the act of flying with a conspecific resulted in a substantial  
295 alteration of the wingbeat – even the adoption of a different kinematic gait. As we now explain,  
296 not only does this earlier omission mean that the costs of flocking have been massively  
297 underestimated – it also means that their mechanistic origin must be re-evaluated.

298

299 Two key hypotheses have been proposed for the increase in wingbeat frequency seen in denser  
300 cluster flocks: *(i)* negative aerodynamic interactions between flock members and *(ii)* increased  
301 need for control and collision avoidance [14]. Whereas a focus on the small effects of spacing  
302 within a flock led previous work to hypothesise a possible aerodynamic basis to the costs of  
303 cluster-flocking [14], our work clearly demonstrates that both birds within a pair increase their  
304 wingbeat frequency, which suggests that these effects are unlikely to have been related to  
305 negative aerodynamic flow interactions, since the bird in front does not fly in the wake of the  
306 bird behind. On the other hand, higher wingbeat frequencies can be used to enhance both  
307 stability and manoeuvrability [14,29–31]. We therefore hypothesise that the increase in  
308 wingbeat frequency is related to paired flight necessitating a greater degree of control, which  
309 could come about in two different ways. First, flying with conspecifics may require enhanced  
310 manoeuvrability and control because birds need to adjust their orientation continuously and  
311 rapidly, both to stay together and to avoid collisions [14]. Second, birds may require enhanced  
312 visual stability when flocking, in order to observe and coordinate with individuals whose  
313 proximity makes the effects of motion parallax significant [32,33].

314

315 Birds make kinematic control inputs on a wingbeat-to-wingbeat basis, so increasing wingbeat  
316 frequency will increase the rate at which control inputs can be made, enhancing the bird's  
317 ability to respond to the movements of others and increasing the precision of its response.  
318 Moreover, increased wingbeat frequency is expected to amplify flight stability [31], which  
319 could both enhance control and visual stability. Unlike humans, birds have a limited range of  
320 eye movement and therefore visual stabilisation is facilitated by compensatory motion of the  
321 sophisticated avian head–neck system and is mediated by visual, vestibular and proprioceptive  
322 cues [34,35]. Without image stabilisation mechanisms, birds would have difficulty  
323 differentiating the motion of a target or obstacle from head or body motions, which is especially  
324 problematic when viewing nearby objects or conspecifics. Our results show that dorsal body  
325 displacement in reaction to the wingbeat is attenuated by 23% in the higher-frequency  
326 kinematic gait adopted in paired flight (see supplementary text for theoretical analysis), which  
327 should naturally translate into a reduced amplitude of head motion. Indeed, using data from  
328 head-mounted accelerometers, we prove that the heads of birds flying in pairs experience  
329 significantly less vertical head displacement relative to flying solo (~30%). Pigeons flying in  
330 pairs have also been recorded to reduce their angular head saccades relative to flying solo,  
331 which suggests either an increased focus on their partner or a decreased focus on the  
332 environment [36]. Furthermore, the linearly declining effect of paired flight with increasing  
333 inter-individual distance suggests that the observed changes in wingbeat frequency are less to  
334 do with the local aerodynamic environment, the effects of which drop off sharply, and are  
335 instead related to the coordination of flock flight, noting that the effects of motion parallax  
336 decline linearly with distance. Together, our results suggest that a higher wingbeat frequency  
337 may be prerequisite for flocking flight because of the increased demands for stability and  
338 control.

339

340 Managing energy expenditure is critical for survival, and is a primary focus for natural  
341 selection. While our results demonstrate that birds can derive navigational benefits from flying  
342 in pairs even during short-range flights along familiar routes, the 7% increase in route accuracy  
343 over this range was apparently insufficient to counterbalance the cost of the 18% increase in  
344 wingbeat frequency, with an estimated increase in mechanical energy expenditure on the order  
345 of 14%. Despite this, only six releases had to be repeated due to birds separating at the start,  
346 and only twelve out of 116 pair releases (10%) resulted in separation part-way through the  
347 release. Hence, the observed preference for paired flight suggests that either (*i*) the general  
348 strategy of flocking is adaptive because the navigational benefits of flocking are sufficient to  
349 outweigh the increased cost of transport when homing over longer distances, or (*ii*) the other  
350 benefits of flocking, such as predator protection, outweigh the increase in energy expenditure  
351 required to fly in pairs, even over quite short distances.

352

353 Although minimizing energy consumption may not be an especially strong selection pressure  
354 for homing pigeons that have been selectively bred to return quickly to the loft, and which have  
355 *ad libitum* access to feed, the results of our study nevertheless indicate that flying with  
356 conspecifics entails an energetically expensive alteration to wingbeat kinematics. As many  
357 other species of birds also preferentially fly in cluster flocks, our results suggest that the  
358 additional benefits of flocking must outweigh any accompanying increase in energy  
359 expenditure. The overall 9% reduction in homing flight time that we observed represents a 9%  
360 reduction in the period over which our birds were exposed to predation risk when returning to  
361 the loft. Moreover, not only does the act of flying in a pair dilute the chance of fatality during  
362 a predation event by 50%, but the probability that such a predation event is successful decreases  
363 as flock size increases, presumably through a combination of increased opportunity for

364 vigilance and predator confusion effects [37]. Therefore, for pigeons, the ultimate benefits of  
365 flocking, such as protection from predators and the pooling of navigational knowledge, must  
366 together outweigh the energetic cost of flying with conspecifics.

367

368 Over longer flight distances or circumstances where an individual has substantially less  
369 navigational knowledge than the flock, it is possible that the navigational benefits of flocking  
370 might be sufficient to produce a net reduction in the amount of energy expended despite the  
371 increased aerodynamic power requirement that we report. In order to gain energetic savings  
372 from a 21% increase in the cost of transport ( $J\ m^{-1}$ ), the homing distance (m) would have to be  
373 >17% shorter when flying in a pair to result in net energetic savings (J). In this scenario, birds  
374 would experience an increased rate of energy expenditure which would be compensated by net  
375 energetic savings and a reduced risk of predation. Either way, the birds in our study still opted  
376 to fly in pairs despite collective travel resulting in an energetic loss at the individual level.

377

378 Overall, the results of our study of a cluster flocking species stand in contrast to previous  
379 studies of birds flying in V-formations [11–13]. Formation flight is typically utilised by  
380 medium to large sized birds during goal-orientated movement, whereas cluster flock  
381 formations are utilised by smaller birds, such as starlings, in movement ranging from orientated  
382 to highly tortuous motion [15,16]. Bird size and the complexity of movement paths may both  
383 contribute to the observed differences in wingbeat patterns between flock formation types.  
384 Whilst birds flying in V-formations are able to fly in aerodynamically optimal positions to  
385 conserve energy, the naturally higher wingbeat frequencies of smaller birds, their smaller  
386 turning angles, and the rapidity of their directional changes may preclude flying in energy-  
387 saving formations and instead necessitate a wingbeat pattern that facilitates a greater degree of  
388 control. Thus, the demands of moving in irregular three-dimensional flocks may alter the way



389 in which a bird flies. Overall, our results provide key new insights into both the biomechanical  
390 consequences of close cluster flocking, and the energetic investments that pigeons make to gain  
391 access to collective navigational knowledge and predator protection. Taken together, our  
392 results demonstrate that flocking is, for pigeons, both fundamentally important and  
393 fundamentally expensive.

394

## 395 **Materials and Methods**

396

### 397 a) Experiment 1

398

#### 399 i) Subjects

400

401 Twenty homing pigeons aged 1 or 3 years were used. Body size was quantified by measuring  
402 tarsus length (mm) and body mass (g). Tarsus length was measured with callipers sensitive to  
403 0.1 mm using the methods described in Sutherland et al. [22]. Body mass was measured using  
404 digital scales (Salter ARC Electronic Kitchen Scales, Salter, UK;  $\pm 1$  g). All subjects completed  
405 a minimum of 15 solo flights from the release site used in this study immediately preceding  
406 the start of the experiment. The subjects were housed with  $\sim 120$  other pigeons in two  
407 neighbouring lofts at the Oxford University Field Station, Wytham, UK ( $51^{\circ}46'58.2''\text{N}$ ,  
408  $1^{\circ}19'2.7''\text{W}$ ). Access to water, grit and a standard pigeon feed mix were available ad libitum  
409 at all times in the loft. The protocols outlined in this paper were approved by the Local Ethical  
410 Review Committee of the University of Oxford's Department of Zoology.

411

#### 412 ii) Data logging

413

414 The birds were tracked using 5 Hz GPS loggers (QStarz BT-Q1300ST, 15 g) and 200 Hz tri-  
415 axial accelerometers ( $\pm 16$  g; Axivity AX3, 11 g), which were attached via Velcro strips glued  
416 to trimmed feathers on the birds' back. In total, the loggers and fastenings weighed 27 g. To  
417 enable subjects to adapt to carrying the additional mass, clay weights were attached to them  
418 throughout the pre-training and experimental periods, which meant the weights were attached  
419 for a minimum of 43 days prior to the start of the experiment. The weights were exchanged for  
420 the loggers immediately prior to each release. GPS and accelerometer data were downloaded  
421 using QTravel (Qstarz International Co., Ltd., Taipei, Taiwan; version 1.48(T)) and Open  
422 Movement (Om) GUI Application (Newcastle University, UK; version 1.0.0.28), respectively.

423

424 The weather, including mean wind speed per minute ( $\text{ms}^{-1}$ ), a running mean of the wind bearing  
425 over the previous ten minutes, temperature ( $^{\circ}\text{C}$ ), humidity (%) and barometric pressure (hPa),  
426 were recorded using a WS2083 Professional Wireless Weather Station with USB upload  
427 (Aercus Instruments, UK) situated 5.5 m above the ground near the pigeon lofts and Cumulus  
428 Weather Station Software (Sandaysoft; version 1.9.4).

429

430       iii)     Experimental procedures

431

432 The release site was located 7.06 km from the loft on a bearing of  $282^{\circ}$  (Barnard Gate;  
433  $51^{\circ}47'48.1''\text{N}$ ,  $1^{\circ}25'3.3''\text{W}$ ). The experiment consisted of four phases: Phase 1 - six individual  
434 releases (solo 1); Phase 2 - six releases with a bird of a similar size (similar-sized pair); Phase  
435 3 - six releases with a bird of a different size (different-sized pair); and Phase 4 - six individual  
436 releases (solo 2). Bird pairings can be found in Table S3. Releases were conducted between  
437 June and September 2015, on days when the sun was visible and the wind speed was  $< 7 \text{ ms}^{-1}$ .  
438 Subjects participated in a maximum of two releases per day, with a minimum of three hours

439 between each release. The birds had to complete a minimum of one third of the flight together  
440 for the flight to be included in the analysis. If the birds spent less than one third of the flight  
441 together, the flight was repeated. In total, six releases out of 116 pair releases had to be  
442 repeated. One different-sized pair did not complete the final pair release after repeatedly  
443 separating. The Velcro failed on bird S27 after the third release with a different-sized bird  
444 therefore the pairing S27 and S84 only completed three different size pair releases and S27 did  
445 not complete the final solos. In addition, S13 only completed one final solo before the Velcro  
446 failed, S87 completed four final solos, and S05 and S25 completed five final solos each. The  
447 remaining 15 birds all completed the final solo releases.

448

449 iv) Data processing

450

451 Data were processed using the procedures outlined in Taylor *et al.* [20]. For each GPS point,  
452 the orthodromic (great-circular) distance travelled and birds' final bearing from the previous  
453 point were calculated using the haversine formula and forward azimuth, respectively. The  
454 dorsal accelerometer measurements were filtered by taking a running mean over three data  
455 points (0.015 s). Static acceleration (or gravity) was removed by subtracting a running mean  
456 over 15 wingbeat cycles ( $> 2$  s; Fig S5). The wingbeat frequency (number of wingbeats per  
457 second; Hz) and peak-to-peak dorsal body (DB) acceleration (g) using the dorsal acceleration  
458 signal (Z-axis) were calculated for each individual wingbeat. The amplitude of the DB  
459 displacement (mm) was then calculated by the double integration of dorsal accelerometer  
460 measurements [14,20]. In addition, we calculated the duration of the "downstroke" from the  
461 peak downstroke force (maximum g-force) to the lower reversal point (minimum g-force). The  
462 "upstroke phase" duration, which included the start of the downstroke, was measured from  
463 minimum g-force to the maximum. We used the maximum and minimum g-force peaks to

464 divide the wingbeat for consistency, as the start of the kinematic downstroke was not  
465 distinguishable in the data from paired flights. See supplementary text for further analysis.

466

467 Wind support, crosswind and airspeed were calculated using the methods described in Safi et  
468 al.[38] using the measurements from the weather station and speed derived from the GPS  
469 devices. Humid air density ( $\text{kg m}^{-3}$ ;  $\rho_{air}$ ) was calculated from measures of barometric pressure  
470 (hPa;  $P$ ), temperature ( $^{\circ}\text{C}$ ;  $T_c$ ) and relative humidity (%;  $\phi$ ) recorded by the weather station,  
471 using the following calculation derived from the ideal gas law:

$$472 \quad \rho_{air} = \left( \frac{P_d}{R_d T} \right) + \left( \frac{P_v}{R_v T} \right)$$

473 where  $P_d$  is pressure of dry air (Pa),  $R_d$  is gas constant for dry air [287.05 J/(kg \* K)],  $P_v$  is  
474 pressure of water vapour (Pa),  $R_v$  is gas constant for water vapour [461.495 J/(kg \* K)] and  $T$  is  
475 ambient temperature (K).  $P_v$  can be calculated from the saturation of vapour pressure ( $P_{sat}$ )  
476 and relative humidity ( $\phi$ ):

$$477 \quad P_v = \phi P_{sat}$$

478 We used the Arden-Buck [39,40] equation to calculate  $P_{sat}$ , where  $P_{sat}$  (hPa) is calculated as:

$$479 \quad P_{sat} = 0.61121 \exp \left( \left( 18.678 - \frac{T_c}{234.5} \right) \left( \frac{T_c}{257.14 + T_c} \right) \right)$$

480  $P_d$  can then be calculated from the barometric pressure ( $P$ ) and the vapour pressure of water  
481 ( $P_v$ ):

$$482 \quad P_d = P - P_v$$

483

484 The birds' route accuracy was calculated using a weighted mean cosine of the angle ( $\theta$ )  
485 between the birds bearing and the bearing to the loft for each timestep, where  $\theta$  is equal to the  
486 smallest angle difference so that  $\theta$  ranged from 0 (heading directly to the loft) and 180 (heading

487 directly away from the loft), and the orthodromic distance between each GPS point ( $d$ ) using  
488 the following calculation:

489 
$$\frac{1}{D} \sum_{i=1}^n d_i \cos \theta_i$$

490  
491 where  $D$  is the total distance flown. Route accuracy is, therefore, on a scale of -1 (heading in a  
492 straight-line away from the destination) to 1 (straight-line to the destination). For orientated  
493 movement, route accuracy is  $>0$ , which means route accuracy is akin to the straight-line index  
494 [41], but enables us to calculate the accuracy for sections of a flight, rather than a whole flight,  
495 which is necessary if the birds separate during the flight and fly solo.

496  
497 The data were trimmed within a 200m radius around the release site and the loft to remove  
498 take-off and landing. When analysing the pair tracks, sections of flight where the birds were  $\geq$   
499 50 m apart was excluded. In addition, if the birds swapped front-vs-back positions, the bird  
500 who spent the majority of the flight in front based on GPS positioning was identified and the  
501 rest of the data from when the other bird was in front was excluded.

502

503 v) Data analysis

504

505 We analysed the data using Bayesian hierarchical models, which are analogous to mixed  
506 models in frequentist methods and enabled us to account for the effects of each bird both as an  
507 individual and a partner in a specific pair. The median wingbeat frequency ( $\bar{W}_{i,j}$ ) for the pair  
508 ( $i, j$ ) was assumed to be normally distributed,

509

510 
$$\bar{W}_{i,j} \sim N(\delta_0 \mathbf{1}_{pair} + \delta_1 \|T_i - T_j\| + \omega_i \mu_i + (1 - \omega_i) \mu_j + \gamma X, \sigma)$$

511

512 where  $1_{pair}$  is an indicator variable equal to 1 if the bird flew in a pair, and 0 for solo flights.

513  $\delta_0$  is the difference in wingbeat frequency between the solo and paired flight.  $\delta_1$  is the

514 difference in wingbeat frequency for every mm absolute difference in tarsus length ( $T$ ) between

515 the pair ( $i, j$ ). For solo flights, the term involving  $\delta_1$  equals zero. The expression  $\omega_i\mu_i + (1 -$

516  $\omega_i)\mu_j$  represents a weighted average of the solo wingbeat frequency ( $\mu$ ) of birds  $i$  and  $j$  with a

517 mixing weighting ( $\omega_i$ ), which determines the weight placed on the bird's own solo wingbeat

518 frequency ( $\mu_i$ ) relative to that of its partner ( $\mu_j$ ). For solo flights, this weighted average equals

519 bird  $i$ 's solo wingbeat frequency ( $\mu_i$ ). The weighting is bounded to lie between 0 and 1 and

520 was determined by a logistic sigmoid function of the absolute difference in tarsus length,

521 
$$\omega_i = \text{logit}^{-1}(\eta_1 + \eta\|T_i - T_j\|)$$

522 However, across all cases, there was no consistent effect of tarsus difference on the mixing

523 weighting.

524

525 Finally,  $\gamma X$  represents the effect of the covariates, which accounts for median wind support (m

526  $\text{s}^{-1}$ ), median crosswind (m  $\text{s}^{-1}$ ), median temperature ( $^{\circ}\text{C}$ ), median humidity (%), humid air

527 density ( $\text{kg m}^{-3}$ ) and the date of release treated as a categorical variable. The birds' median

528 airspeed (m  $\text{s}^{-1}$ ) was also added as a covariate on all models except for models of airspeed. We

529 used airspeed rather than ground speed as a covariate because ground speed and wind support

530 were correlated (Fig. S5). In terms of the response variable, there was almost no difference

531 between the models of airspeed and ground speed as the model accounts for the effect of wind

532 (0.64, 95% CrI [0.08, 1.20] compared to 0.69, 95% CrI [0.10, 1.28]). For consistency with the

533 covariates, we present the results of the model for airspeed. A covariate indicating whether the

534 bird was a leader or follower was also added to the model in a secondary analysis to determine

535 the effect of the birds' position on wingbeat frequency.

536

537 In addition to modelling the median values, we also took a random sample of 100 individual  
538 wingbeats to analyse the effect of horizontal distance between birds in pairs. We analysed  
539 horizontal distance rather than three-dimensional distance because GPS precision is generally  
540 poorer in the vertical than the horizontal [42]. Horizontal distance (m) was added as a covariate  
541 to the paired data, along with a categorical covariate identifying the specific bird and flight to  
542 account for the repeated measures of 50 wingbeats from one flight. In total, 44,500 wingbeats  
543 from 454 unique bird and flight combinations were analysed.

544

545 To investigate whether the birds were flying in phase, we used the following model to identify  
546 whether the median wingbeat frequency of the follower ( $\bar{W}_F$ ) is related to the leader ( $\bar{W}_L$ ) in  
547 pair ( $P$ ):

$$548 \quad \bar{W}_F \sim N(\alpha_P + \beta_P \bar{W}_L + \gamma X, \sigma')$$

549

550 We also investigated whether the difference between the leader and follower's tarsus length,  
551 body mass or solo airspeed ( $S$ ) predicted why the bird was a leader ( $L$ ) in the pair using a  
552 Bernoulli regression:

$$553 \quad L_i \sim \text{Bernoulli}(\alpha_P + \beta_P S_i)$$

554

555 The model priors were centred on the null hypothesis using the mean, standard deviation and  
556 square root standard deviation of the solo data (Table S4). Eight Markov chain Monte Carlo  
557 (MCMC) chains were run simultaneously, each with 12,500 warm-up and 12,500 model  
558 iterations, which resulted in 100,000 samples for each posterior distribution. For the model  
559 involving raw wingbeat data, the model was run for 10,000 samples due to the size of the  
560 model. Across all estimated models and parameters, we detected convergence in the sampling

561 distribution as determined by using a criterion  $\hat{R} \leq 1.1$  on all parameters[43]. The number of  
562 divergent iterations was 0.0-1.3% of the total sample size. The code for the wingbeat frequency  
563 model and the model output can be found in the Supplementary Materials.

564

565 In addition to these results, one similar-sized pair (birds B01 and B82 with a tarsus length of  
566 32.4 mm and 33.3 mm, respectively) and one different-sized pair (birds B01 and B07 with a  
567 tarsus length of 32.4 mm and 35.2 mm, respectively) split and flew solo for more than 30% of  
568 the flight for three of their six releases. As the sample size is low, only descriptive statistics  
569 can be performed comparing the paired (< 50 m distance between birds) and solo flight (> 300  
570 m distance).

571

572 We approximated the number of wingbeats difference between the solo and paired flight using  
573 the total flight distance (excluding the 200m take-off and landing) and the model results from  
574 route accuracy, airspeed and wingbeat frequency (Table S2). We calculated the number of  
575 wingbeats difference as not all of birds completed 100% of the paired flights together or with  
576 one leader.

577

578 Data processing and analysis were conducted using MATLAB (MathWorks, Natick, USA;  
579 version R2015a) and the open-source software R (version 3.4.2) [44]. Bayesian models were  
580 written in Stan [45] using the R interface RStan (version 2.16.2) [46].

581

582 *b) Experiment 2*

583

584 *i) Subjects*

585



586 Six homing pigeons aged 3 to 10 years old were used. The pigeons were held under the same  
587 conditions as outlined above and all had experience of experimental releases and the release  
588 site. The protocols outlined in this paper were approved by the University of Oxford's Zoology  
589 Animal Welfare Ethical Review Board (No. APA/1/5/ZOO/NASPA/Biro/  
590 PigeonsHeadmountedsensors).

591

592 ii) Data logging

593

594 We used a custom-built 'p-Sensor' to simultaneously record head movement and position. The  
595 p-Sensor included an IMU with a combination of a tri-axial gyroscope, tri-axial accelerometer  
596 and tri-axial magnetometer recording at 60 Hz, and a GPS logger recording at 10 Hz. The IMU  
597 was mounted using double-sided tape onto a custom-made and custom-fitted wire mask  
598 designed to fit each bird's head. The GPS logger, SD card, battery and microcomputer were  
599 placed in an elasticated backpack on the birds back. The instrumentation, mask, and backpack  
600 weighed 28.1 g and constituted 4.9 % of the body mass of the smallest bird, of which the IMU  
601 unit on the bird's head only weighed 1 g. For more details, see Kano et al. [36].

602

603 All birds were habituated to wearing the custom-made mask for at least seven days prior to the  
604 flight. For each day of habituation, the bird was fitted with a mask and carefully monitored for  
605 two hours within its home loft for signs of discomfort and abnormal patterns of locomotion.  
606 After seven days of habitation in the loft, the pigeons were released outside the loft and allowed  
607 to fly freely under close observation.

608

609 iii) Experimental procedures

610

611 The release site was located 0.95 km from the loft on a bearing of 199° (Wytham Woods;  
612 51°46'29.4"N, 1°19'18.7"W). The experiments were conducted on the 23<sup>rd</sup> July 2017.  
613 Releases were only conducted when the wind was low (<5 m s<sup>-1</sup>) and the sun's disc was visible.  
614 For the day of testing, the birds were fitted with a mask and allowed to habituate to wearing  
615 the mask in the home loft before being transported to the release site by car. The birds were  
616 released once solo and once in a pair on the same day. The release order was randomised.

617

618 iv) Data processing and analysis

619

620

621 The data processing was conducted as outlined in Taylor et al. [20]. Vertical (Z-axis)  
622 accelerometer measurements were smoothed by taking a running mean over five datapoints  
623 (0.083 s) and then filtered using a 4<sup>th</sup> order high-pass Butterworth filter with a cut-off frequency  
624 of 1 Hz. The peak-to-peak vertical head displacement was calculated by the double integration  
625 of the vertical accelerometer measurements. We compared the median peak-to-peak vertical  
626 head displacement between solo and paired releases for each bird.

627

628 The raw data will be available on data dryad after acceptance.

629

### 630 **Acknowledgments:**

631 We thank Lucy Larkman, Dave Wilson and Phil Smith for animal husbandry and technical  
632 support and Fumihiro Kano for his contributions to the development of the head-mounted  
633 sensor and mask for head attachment. We thank Marco Klein Heerenbrink, Oliver Padget, Jay  
634 Willis and Simon Taylor for helpful discussions. We thank Eoin Malins from the University  
635 of Oxford's Doctoral Training Centre for providing computer access. L.A.T. and J.A.W. were

636 funded by the Biotechnology and Biological Sciences Research Council (BBSRC) UK (grant  
637 number BB/J014427/1). B.L. was funded by Engineering and Physical Sciences Research  
638 Council (EPSRC) UK (grant number EP/F500394/1).

639

## 640 **References**

641

- 642 1. Krause J, Ruxton GD. Living in groups. Oxford, UK: Oxford University Press; 2002.
- 643 2. Herbert-Read JE. Understanding how animal groups achieve coordinated movement. *J*  
644 *Exp Biol*. 2016;219: 2971–2983. doi:10.1242/jeb.129411
- 645 3. Vicsek T, Zafeiris A. Collective motion. *Phys Rep*. Elsevier B.V.; 2012;517: 71–140.  
646 doi:10.1016/j.physrep.2012.03.004
- 647 4. Ward AJW, Herbert-Read JE, Sumpter DJT, Krause J. Fast and accurate decisions  
648 through collective vigilance in fish shoals. *Proc Natl Acad Sci U S A*. 2011;108: 2312–  
649 2315. doi:10.1073/pnas.1101616108
- 650 5. Biro D, Sumpter DJT, Meade J, Guilford T. From Compromise to Leadership in Pigeon  
651 Homing. *Curr Biol*. 2006;16: 2123–2128. doi:10.1016/j.cub.2006.08.087
- 652 6. Dell’Ariccia G, Dell’Omo G, Wolfer DP, Lipp HP. Flock flying improves pigeons’  
653 homing: GPS track analysis of individual flyers versus small groups. *Anim Behav*.  
654 2008;76: 1165–1172. doi:10.1016/j.anbehav.2008.05.022
- 655 7. Simons AM. Many wrongs: the advantage of group navigation. *Trends Ecol Evol*.  
656 2004;19: 453–455. doi:10.1016/j.tree.2004.07.001
- 657 8. Berdahl A, Torney CJ, Ioannou CC, Faria JJ, Couzin ID. Emergent Sensing of Complex  
658 Environments by Mobile Animal Groups. *Science*. 2013;339: 574–576.  
659 doi:10.1126/science.1225883
- 660 9. Bill RG, Herrnkind WF. Drag Reduction by Formation Movement in Spiny Lobsters.

- 661 Science. 1976;193: 1146–1148.
- 662 10. Liao JC, Beal DN, Lauder G V, Triantafyllou MS. Fish Exploiting Vortices Decrease  
663 Muscle Activity. *Science*. 2003;302: 1566–1569. doi:10.1126/science.1088295
- 664 11. Weimerskirch H, Martin J, Clerquin Y, Alexandre P, Jiraskova S. Energy saving in flight  
665 formation. *Nature*. 2001;413: 697–698. doi:10.1038/35099670
- 666 12. Portugal SJ, Hubel TY, Fritz J, Heese S, Trobe D, Voelkl B, et al. Upwash exploitation  
667 and downwash avoidance by flap phasing in ibis formation flight. *Nature*. Nature  
668 Publishing Group; 2014;505: 399–402. doi:10.1038/nature12939
- 669 13. Voelkl B, Portugal SJ, Unsöld M, Usherwood JR, Wilson AM, Fritz J. Matching times  
670 of leading and following suggest cooperation through direct reciprocity during V-  
671 formation flight in ibis. *Proc Natl Acad Sci U S A*. 2015;112: 2115–20.  
672 doi:10.1073/pnas.1413589112
- 673 14. Usherwood JR, Stavrou M, Lowe JC, Roskill K, Wilson AM. Flying in a flock comes  
674 at a cost in pigeons. *Nature*. Nature Publishing Group; 2011;474: 494–497.  
675 doi:10.1038/nature10164
- 676 15. Bajec IL, Heppner FH. Organized flight in birds. *Anim Behav*. Elsevier Ltd; 2009;78:  
677 777–789. doi:10.1016/j.anbehav.2009.07.007
- 678 16. Heppner FH. Avian flight formations. *Bird-Banding*. 1974;45: 160–169.
- 679 17. Schmidt-Nielsen K. Locomotion: Energy Cost of Swimming, Flying, and Running.  
680 *Science*. 1972;177: 222–228. doi:10.1126/science.177.4045.222
- 681 18. Tobalske BW, Hedrick TL, Dial KP, Biewener AA. Comparative power curves in bird  
682 flight. *Nature*. 2003;421: 363–366. doi:10.1038/nature01367.1.
- 683 19. Nagy M, Akos Z, Biro D, Vicsek T, Ákos Z, Biro D, et al. Hierarchical group dynamics  
684 in pigeon flocks. *Nature*. 2010;464: 890–893. doi:10.1038/nature08891
- 685 20. Taylor LA, Portugal SJ, Biro D. Homing pigeons (*Columba livia*) modulate wingbeat

- 686 characteristics as a function of route familiarity. *J Exp Biol.* 2017;220: 2908–2915.
- 687 21. Tobalske BW, Dial KP. Flight kinematics of black-billed magpies and pigeons over a  
688 wide range of speeds. *J Exp Biol.* 1996;199: 263–280. Available:  
689 <http://www.ncbi.nlm.nih.gov/pubmed/9317775>
- 690 22. Sutherland WJ, Newton I, Green R. *Bird ecology and conservation: a handbook of*  
691 *techniques.* Oxford, UK: Oxford University Press; 2004.
- 692 23. Esri, HERE, DeLorme, Intermap, INCREMENT P, GEBCO, et al. World Topographic  
693 Map. [Internet]. 2013 [cited 21 Jun 2017]. Available:  
694 [http://services.arcgisonline.com/ArcGIS/rest/services/World\\_Topo\\_Map/MapServer](http://services.arcgisonline.com/ArcGIS/rest/services/World_Topo_Map/MapServer)
- 695 24. Tobalske BW. Biomechanics and Physiology of Gait Selection in Flying Birds. *Physiol*  
696 *Biochem Zool.* 2000;73: 736–750. doi:10.1086/318107
- 697 25. Hedenström A, Åkesson S. Flight speed adjustment by three wader species in relation  
698 to winds and flock size. *Anim Behav.* 2017;134: 209–215.  
699 doi:10.1016/j.anbehav.2017.10.022
- 700 26. Floryan D, Van Buren T, Smits AJ. Efficient cruising for swimming and flying animals  
701 is dictated by fluid drag. *PNAS.* 2018; 201805941. doi:10.1073/pnas.1805941115
- 702 27. van den Berg C, Rayner J. The moment of inertia of bird wings and the inertial power  
703 requirement for flapping flight. *J Exp Biol.* 1995;198: 1655–64. Available:  
704 <http://www.ncbi.nlm.nih.gov/pubmed/9319563>
- 705 28. Burgess SC, Lock RJ, Wang J, Sattler GD, Oliver JD. The effect of aerodynamic braking  
706 on the inertial power requirement of flapping flight: case study of a gull. *Int J Micro Air*  
707 *Veh.* 2014;6: 117–128. doi:10.1260/1756-8293.6.2.117
- 708 29. Hedrick TL, Cheng B, Deng X. Wingbeat Time and the Scaling of Passive Rotational  
709 Damping in Flapping Flight. *Science.* 2009;324: 252–255.  
710 doi:10.1126/science.1168431

- 711 30. Williams CD, Biewener AA. Pigeons trade efficiency for stability in response to level  
712 of challenge during confined flight. *Proc Natl Acad Sci U S A*. 2015;112: 3392–3396.  
713 doi:10.1073/pnas.1407298112
- 714 31. Taylor GK, Thomas ALR. Animal flight dynamics II. Longitudinal stability in flapping  
715 flight. *J Theor Biol*. 2002;214: 351–370. doi:10.1006/jtbi.2001.2470
- 716 32. Frost BJ, Wylie DR, Wang YC. The processing of object and self-motion in the  
717 tectofugal and accessory optic pathways of birds. *Vision Res*. 1990;30: 1677–1688.  
718 doi:10.1016/0042-6989(90)90152-B
- 719 33. Frost J. The optokinetic basis of head-bobbing in the pigeon. *J Exp Biol*. 1978;74: 187–  
720 195.
- 721 34. Gioanni H. Stabilizing gaze reflexes in the pigeon (*Columba livia*) - I. Horizontal and  
722 vertical optokinetic eye (OKN) and head (OCR) reflexes. *Exp Brain Res*. Springer-  
723 Verlag; 1988;69: 567–582. doi:10.1007/BF00247310
- 724 35. Land MF. The roles of head movements in the search and capture strategy of a tern  
725 (*Aves, Laridae*). *J Comp Physiol - A Sensory, Neural, Behav Physiol*. 1999;184: 265–  
726 272. doi:10.1007/s003590050324
- 727 36. Kano F, Walker J, Takao S, Biro D. Head-mounted sensors reveal visual attention of  
728 free-flying homing pigeons. *J Exp Biol*. 2018;221. doi:10.1098/rstb.2011.0034
- 729 37. Kenward RE. Hawks and Doves: Factors Affecting Success and Selection in Goshawk  
730 Attacks on Woodpigeons. *J Anim Ecol*. 1978;47: 449. doi:10.2307/3793
- 731 38. Safi K, Kranstauber B, Weinzierl R, Griffin L, Rees EC, Cabot D, et al. Flying with the  
732 wind: scale dependency of speed and direction measurements in modelling wind support  
733 in avian flight. *Mov Ecol*. 2013;1: 4. doi:10.1186/2051-3933-1-4
- 734 39. Buck AL. New equations for computing vapor pressure and enhancement factor. *J Appl*  
735 *Meteorology*. 1981;20: 1527–1532.

- 736 40. Buck AL. Buck Research CR-1A User's Manual. Boulder, CO, USA: Buck Research  
737 Instruments; 1996.
- 738 41. Batschelet E. Circular statistics in biology. London, UK: Academic Press; 1981.
- 739 42. Acharaya R. Understanding satellite navigation. London, UK: Academic Press; 2014.
- 740 43. Gelman A, Rubin DB. Inference from iterative simulation using multiple sequences. Stat  
741 Sci. 1992;7: 457–472.
- 742 44. R Core Team. R: A language and environment for statistical computing [Internet].  
743 Vienna, Austria: R Foundation for Statistical Computing; 2017. Available:  
744 <https://www.r-project.org/>
- 745 45. Carpenter B, Gelman A, Hoffman MD, Lee D, Goodrich B, Betancourt M, et al. Stan:  
746 A Probabilistic Programming Language. J Stat Softw. 2017;76.  
747 doi:10.18637/jss.v076.i01
- 748 46. Stan Development Team. RStan: the R interface to Stan: <http://mc-stan.org> [Internet].  
749 2017.

750

751 **Figure 1. Examples of accelerometer and GPS data recorded during solo and paired**  
752 **flights. A**, Bird S30 carrying an accelerometer (top) and GPS sensor (bottom) attached via  
753 Velcro strips. **B-E**, Dorsal body (DB) acceleration recorded by the accelerometer during S30's  
754 final release in each of the four conditions: **B**, solo flight (blue); **C**, paired flight with a similar-  
755 sized bird (red); **D**, paired flight with a different-sized bird (dark red) and **E**, solo flight (dark  
756 blue). Accelerometer data has been filtered and gravity removed (see Methods). Note the  
757 higher wingbeat frequency when the bird is flying in a pair. **F**, Routes flown by S30 during the  
758 final release of each of the four conditions (same flights as those shown in **B-E**). Note the  
759 straighter trajectory, and hence greater route accuracy, of the paired flights. Black circle  
760 corresponds to the release site and white circle corresponds to the home loft. Map designed

761 using ArcGIS 10.4.1 (Esri Inc., Redlands, USA) using the World Topographic Map[23]. Scale  
762 bar shows 3 km.

763

764 **Figure 2. Wingbeat frequency as a function of flight number. A-D**, Median wingbeat  
765 frequency (raw data with no covariates) for all 20 birds during each of the four experimental  
766 phases: **A**, six individual releases (solo); **B**, six releases with a similar-sized bird (similar-sized  
767 pair); **C**, six releases with a different-sized bird (different-sized pair); and **D**, six individual  
768 releases (solo). **E-H**, Raw wingbeat frequency data for birds which flew in a pair (< 50 m  
769 distance) and solo (> 300 m) during the same flight. **E** and **G** are from the similar sized pair of  
770 birds B01 and B82, respectively (pictured). **F** and **H** are from the different-sized pair B01 and  
771 B07 (pictured). Boxplots show the median and upper and lower quartiles, and whiskers  
772 correspond to 1.5 times the interquartile range.

773

774 **Figure 3.** Boxplot of median vertical peak-to-peak head displacement across six birds, each  
775 flying once solo and once in a pair. Bottom and top edges of the box indicate the 25th and 75th  
776 percentiles and the whiskers extend to the most extreme data points. Note that there is no  
777 overlap between the median head displacements in the two conditions.



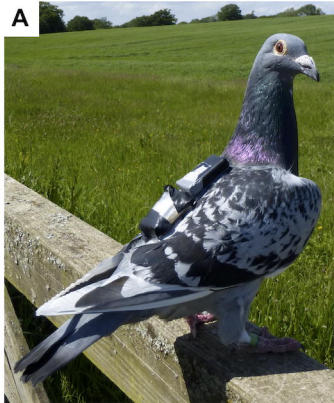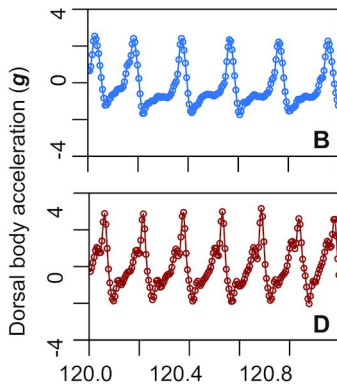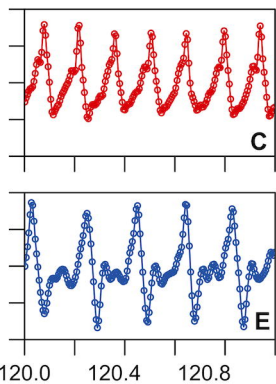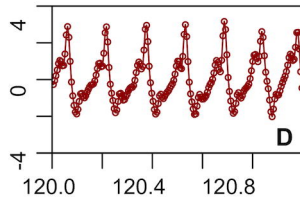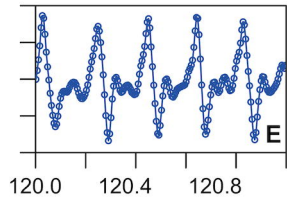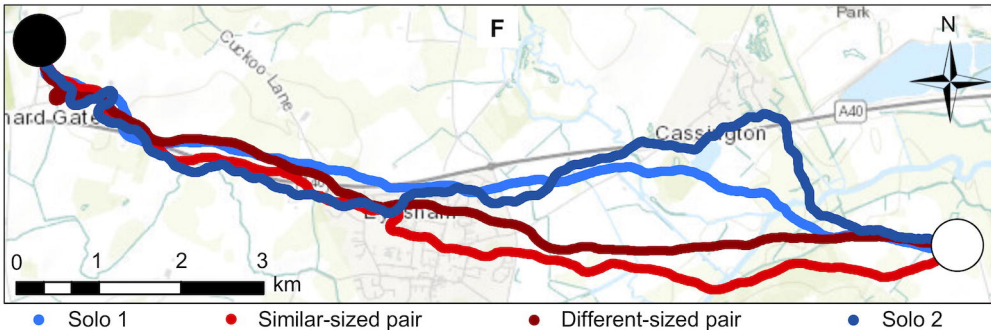

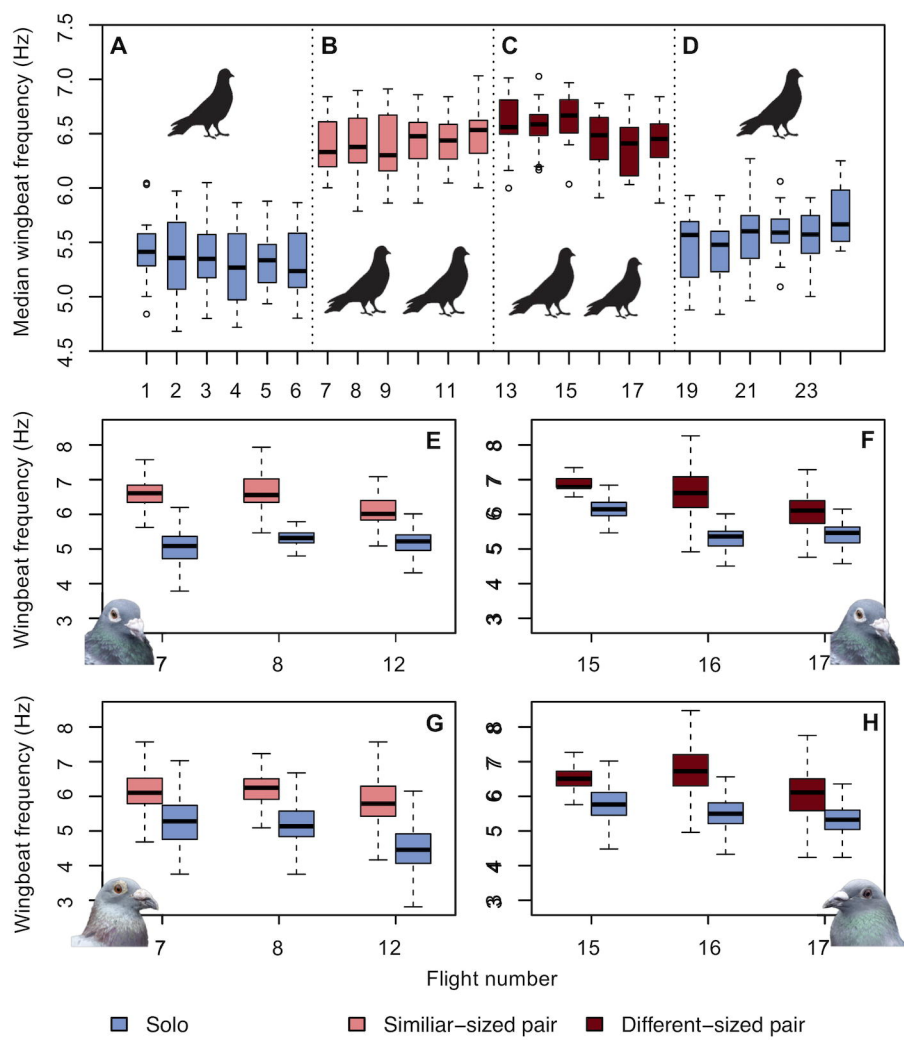

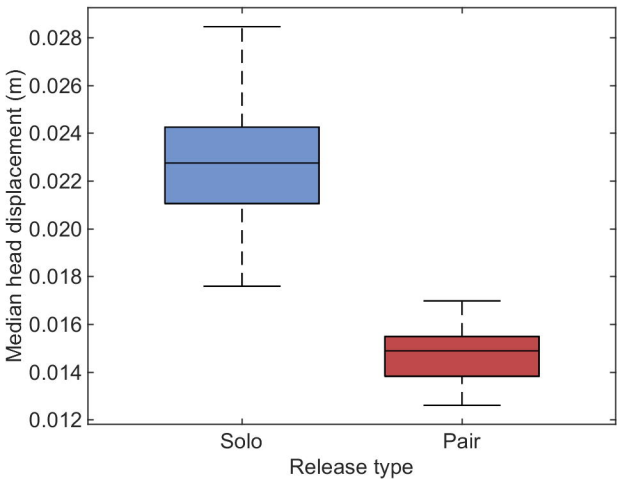

Source: https://www.biorxiv.org/content/10.1101/492090v1.full.pdf
